# Supplementary material for: Isocyanide π-Hole Interactions Supported by Aurophilic Forces
Source: Preprints.org preprint supplement (doi:10.20944/preprints202307.0686.v1), 2023-07-11
Supplement: Supplementary file 2 [file supplementary]

**Supplementary Materials**

Isocyanide π-hole Interactions Supported by Aurophilic Forces

Andrey S. Smirnov 1, Mikhail A. Kinzhalov 1, Rosa M. Gomila 2, Antonio Frontera 2, Nadezhda A. Bokach 1, Vadim Yu. Kukushkin 1, 3*

1St Petersburg State University, Universitetskaya Nab. 7/9, Saint Petersburg, 199034 Russian Federation; v.kukushkin@spbu.ru

2Department of Chemistry, Universitat de les Illes Balears, Crta. de Valldemossa km 7.5, 07122 Palma de Mallorca (Baleares), Spain

3Laboratory of Crystal Engineering of Functional Materials, South Ural State University, 76, Lenin Av., Chelyabinsk, 454080 Russian Federation; v.kukushkin@spbu.ru

***** Correspondence: v.kukushkin@spbu.ru

| **Table S1.**Crystal data and structure refinement for **1**. | |
| --- | --- |
| Identification code | **1** |
| Empirical formula | C7H3AuCl2IN |
| Formula weight | 495.87 |
| Temperature/K | 100.0(7) |
| Crystal system | monoclinic |
| Space group | P21/c |
| a/Å | 9.54600(10) |
| b/Å | 4.04860(10) |
| c/Å | 25.7236(4) |
| α/° | 90 |
| β/° | 91.8880(10) |
| γ/° | 90 |
| Volume/Å3 | 993.62(3) |
| Z | 4 |
| ρcalcg/cm3 | 3.315 |
| μ/mm–1 | 56.715 |
| F(000) | 872.0 |
| Crystal size/mm3 | 0.08 × 0.05 × 0.02 |
| Radiation | CuKα (λ = 1.54184) |
| 2Θ range for data collection/° | 6.876 to 134.958 |
| Index ranges | –11 ≤ h ≤ 8, –4 ≤ k ≤ 4, –30 ≤ l ≤ 30 |
| Reflections collected | 7902 |
| Independent reflections | 1788 [*R*int = 0.0453, *R*sigma = 0.0355] |
| Data/restraints/parameters | 1788/0/109 |
| Goodness-of-fit on *F*2 | 1.058 |
| Final R indexes [I>=2σ(I)] | *R*1 = 0.0271, w*R*2 = 0.0681 |
| Final R indexes [all data] | *R*1 = 0.0280, w*R*2 = 0.0692 |
| Largest diff. peak/hole / e Å-3 | 1.49/–1.61 |
